# Supplementary material for: The Last 1200 Years of Rainfall/Runoff Variability along the Central Mexico Pacific Coast Associated with the North American Monsoon
Source: MDPI journal article supplement (doi:10.3390/oceans2030030), 2021-08-02
Supplement: s1 [file s1]

### Multi-core rock magnetic data

| REV DEPTH | CHI      | ARM/CHI |
|-----------|----------|---------|
| 1         | 1.40E-04 | 1.4714  |
| 3         | 1.42E-04 | 1.3298  |
| 5         | 1.49E-04 | 1.433   |
| 7         | 1.48E-04 | 1.4159  |
| 9         | 1.36E-04 | 1.4579  |
| 11        | 1.34E-04 | 1.4568  |
| 13        | 1.60E-04 | 1.3892  |
| 15        | 1.46E-04 | 0.44288 |
| 17        | 1.18E-04 | 1.618   |
| 19        | 1.50E-04 | 1.5149  |
| 21        | 1.63E-04 | 1.488   |
| 23        | 1.42E-04 | 1.503   |
| 25        | 1.94E-04 | 1.2266  |
| 27        | 1.69E-04 | 1.4179  |
| 29        | 1.71E-04 | 1.4004  |
| 31        | 1.65E-04 | 1.3439  |
| 33        | 1.47E-04 | 1.5248  |
| 35        | 1.29E-04 | 1.58    |
| 37        | 1.05E-04 | 1.5996  |
| 39        | 1.13E-04 | 1.6269  |
| 41        | 1.17E-04 | 1.5435  |
| 43        | 1.17E-04 | 1.3331  |
| 45        | 1.21E-04 | 1.2851  |
| 47        | 1.17E-04 | 1.1424  |
| 49        | 1.28E-04 | 0.98503 |
| 51        | 1.23E-04 | 0.85836 |
| 53        | 1.08E-04 | 0.77346 |
| 55        | 1.05E-04 | 0.69108 |
| 57        | 1.13E-04 | 0.73102 |
| 59        | 1.13E-04 | 0.70716 |

### Gravity core rock magnetic data

| Depth (cm) | Yrs AD | CHI   | ARM/CHI  |
|------------|--------|-------|----------|
| 1          | 1893   | 179.3 | 2.49E-07 |
| 3.5        | 1883   | 171.9 | 2.40E-07 |
| 6          | 1868   | 151.6 | 3.59E-07 |
| 8          | 1854   | 161.4 | 6.15E-07 |
| 10.5       | 1842   | 130.5 | 4.92E-07 |
| 12.5       | 1833   | 85.26 | 2.67E-07 |
| 15         | 1820   | 108.6 | 1.78E-07 |
| 17         | 1811   | 96.43 | 2.55E-07 |
| 21         | 1791   | 92.51 | 2.39E-07 |
| 23         | 1782   | 79.78 | 2.25E-07 |
| 25         | 1772   | 74.44 | 2.24E-07 |

|      |      |       |          |
|------|------|-------|----------|
| 27   | 1762 | 66.57 | 2.08E-07 |
| 29   | 1753 | 57.18 | 2.48E-07 |
| 31   | 1742 | 50.48 | 2.61E-07 |
| 33   | 1733 | 58.59 | 2.91E-07 |
| 35   | 1723 | 69.09 | 2.69E-07 |
| 37   | 1713 | 73.32 | 2.30E-07 |
| 39   | 1702 | 78.33 | 2.21E-07 |
| 41   | 1693 | 83.97 | 1.98E-07 |
| 43   | 1683 | 85.19 | 2.04E-07 |
| 45   | 1672 | 68.22 | 2.17E-07 |
| 47   | 1663 | 57.01 | 2.74E-07 |
| 49   | 1653 | 56.52 | 2.58E-07 |
| 51   | 1643 | 52.65 | 2.39E-07 |
| 53   | 1633 | 39.8  | 2.64E-07 |
| 55   | 1623 | 28.43 | 2.99E-07 |
| 57   | 1612 | 19.55 | 4.23E-07 |
| 59   | 1603 | 34.04 | 2.96E-07 |
| 61   | 1592 | 52.39 | 2.90E-07 |
| 63   | 1582 | 57.37 | 2.83E-07 |
| 65   | 1573 | 55.97 | 2.45E-07 |
| 67   | 1562 | 42.18 | 2.60E-07 |
| 69   | 1552 | 43.5  | 2.45E-07 |
| 71   | 1542 | 47.65 | 2.62E-07 |
| 75.5 | 1519 | 23.97 | 3.47E-07 |
| 77.5 | 1508 | 33.02 | 3.56E-07 |
| 79.5 | 1499 | 36.71 | 3.12E-07 |
| 81.5 | 1488 | 24.17 | 3.09E-07 |
| 83.5 | 1477 | 31.88 | 2.88E-07 |
| 85.5 | 1468 | 40.53 | 2.49E-07 |
| 87.5 | 1457 | 29.05 | 3.44E-07 |
| 89.5 | 1447 | 48.21 | 2.65E-07 |
| 91.5 | 1437 | 27.45 | 4.00E-07 |
| 93.5 | 1426 | 27.02 | 4.08E-07 |
| 95.5 | 1416 | 21.88 | 3.66E-07 |
| 97.5 | 1406 | 22.04 | 3.60E-07 |
| 101  | 1387 | 32.69 | 2.76E-07 |
| 103  | 1377 | 58.6  | 2.64E-07 |
| 105  | 1367 | 57.21 | 2.49E-07 |
| 107  | 1356 | 40.1  | 3.62E-07 |
| 109  | 1346 | 24.41 | 4.65E-07 |
| 111  | 1336 | 40.72 | 3.07E-07 |
| 113  | 1325 | 31.77 | 3.30E-07 |
| 117  | 1310 | 19.03 | 3.61E-07 |

|     |      |       |          |
|-----|------|-------|----------|
| 119 | 1294 | 22.07 | 4.30E-07 |
| 121 | 1283 | 9.096 | 7.61E-07 |
| 123 | 1273 | 29.75 | 4.58E-07 |
| 125 | 1263 | 27.65 | 4.85E-07 |
| 127 | 1252 | 25    | 4.43E-07 |
| 129 | 1241 | 28.88 | 3.99E-07 |
| 131 | 1232 | 27.44 | 3.88E-07 |
| 133 | 1221 | 35.89 | 3.85E-07 |
| 135 | 1210 | 23.13 | 4.54E-07 |
| 137 | 1200 | 17.04 | 5.59E-07 |
| 139 | 1189 | 30.35 | 4.59E-07 |
| 142 | 1173 | 11.72 | 5.28E-07 |
| 144 | 1163 | 13.54 | 4.89E-07 |
| 146 | 1153 | 24.65 | 3.68E-07 |
| 148 | 1142 | 32.98 | 3.78E-07 |
| 150 | 1131 | 24.04 | 4.42E-07 |
| 152 | 1121 | 27.93 | 4.50E-07 |
| 154 | 1110 | 22.96 | 5.10E-07 |
| 156 | 1099 | 31.62 | 3.63E-07 |
| 158 | 1089 | 13.85 | 5.32E-07 |
| 160 | 1079 | 14.34 | 5.08E-07 |
| 162 | 1068 | 7.278 | 8.44E-07 |
| 164 | 1058 | 22.4  | 4.65E-07 |
| 167 | 1042 | 26.21 | 4.96E-07 |
| 169 | 1031 | 26.79 | 5.28E-07 |
| 171 | 1021 | 37.16 | 3.62E-07 |
| 173 | 1010 | 38.21 | 3.35E-07 |
| 175 | 999  | 37.95 | 3.30E-07 |
| 177 | 988  | 38.07 | 3.57E-07 |
| 179 | 978  | 36.83 | 3.48E-07 |
| 181 | 967  | 26.59 | 4.53E-07 |
| 183 | 957  | 24.11 | 4.72E-07 |
| 185 | 947  | 36.06 | 3.35E-07 |
| 187 | 936  | 36.06 | 3.38E-07 |
| 189 | 924  | 24.71 | 3.61E-07 |

#### Gravity core Ti and N15 data

| Ti     | 10yr ti | Year | Age 15N | d15N |
|--------|---------|------|---------|------|
| 3437   |         | 1677 | 1677.3  | 9.5  |
| 3544.8 |         | 1675 | 1675.9  | 9.54 |
| 3448   |         | 1674 | 1674.4  | 9.63 |
| 3796.2 |         | 1672 | 1673    | 9.67 |
| 3821.7 |         | 1671 | 1671.6  | 9.48 |

|        |        |      |        |       |
|--------|--------|------|--------|-------|
| 3778.7 | 3735.8 | 1670 | 1670.1 | 9.5   |
| 4197   | 3757.3 | 1668 | 1668.7 | 9.47  |
| 4309   | 3681.8 | 1667 | 1667.2 | 9.6   |
| 3618   | 3615.4 | 1665 | 1665.8 | 9.72  |
| 3335   | 3495.2 | 1664 | 1664.4 | 9.4   |
| 3808.7 | 3399.1 | 1662 | 1662.9 | 9.21  |
| 3673   | 3318.1 | 1661 | 1661.5 | 9.47  |
| 2714   | 3256.4 | 1660 | 1660.1 | 9.66  |
| 2718.5 | 3221.7 | 1658 | 1658.6 | 9.59  |
| 2474   | 3249.6 | 1657 | 1657.2 | 9.46  |
| 2764.4 | 3156   | 1655 | 1655.7 | 9.3   |
| 2887   | 3077.9 | 1654 | 1654.3 | 9.12  |
| 3518.5 | 3046.8 | 1652 | 1652.9 | 9.24  |
| 3927.2 | 3154.6 | 1651 | 1651.4 | 9.16  |
| 3925.6 | 3243.9 | 1649 | 1650   | 9.19  |
| 2304.7 | 3379.7 | 1648 | 1648.5 | 9.24  |
| 2950.2 | 3436.4 | 1647 | 1647.1 | 9.24  |
| 3330   | 3436.8 | 1645 | 1645.7 | 9.26  |
| 3900.5 | 3476.5 | 1644 | 1644.2 | 9.11  |
| 3700.8 | 3446.3 | 1642 | 1642.8 | 9.29  |
| 3967.5 | 3225.1 | 1641 | 1641.3 | 9.25  |
| 3388.5 | 3160.7 | 1639 | 1639.9 | 9.24  |
| 2891.2 | 3212.7 | 1637 | 1637.7 | 9.32  |
| 3955.5 | 3271.7 | 1635 | 1635.6 | 9.28  |
| 3594.8 | 3232.3 | 1634 | 1634.1 | 9.35  |
| 1492.8 | 3045.7 | 1632 | 1632.7 | 9.43  |
| 1596.3 | 2915   | 1631 | 1631.2 | 9.36  |
| 3522.5 | 2953.9 | 1629 | 1629.8 | 9.32  |
| 3978   | 2922.7 | 1628 | 1628.3 | 9.67  |
| 3467.5 | 2838.2 | 1626 | 1626.9 | 9.7   |
| 1647.7 | 2825.1 | 1625 | 1625.5 | 9.67  |
| 2529.8 | 2932.6 | 1624 | 1624   | 9.56  |
| 3816.8 | 2976.5 | 1622 | 1622.6 | 9.53  |
| 2548   | 2847.9 | 1621 | 1621.1 | 9.57  |
| 3025.7 | 2579.3 | 1619 | 1619.7 | 9.72  |
| 3451   | 2587.8 | 1618 | 1618.2 | 9.84  |
| 2675.7 | 2759.8 | 1616 | 1616.8 | 9.55  |
| 2078.8 | 2709.4 | 1615 | 1615.3 | 9.7   |
| 2107.5 | 2695.7 | 1613 | 1613.9 | 10.03 |
| 1023.8 | 2743.2 | 1612 | 1612.4 | 9.55  |
| 3560.8 | 2678.8 | 1610 | 1611   | 9.98  |
| 3539.8 | 2591.8 | 1609 | 1609.5 | 9.96  |
| 1976   | 2664   | 1608 | 1608.1 | 9.44  |
| 3666   | 2811.3 | 1606 | 1606.6 | 9.55  |
| 3070.2 | 2852.6 | 1605 | 1605.2 | 9.57  |
| 2317.2 | 2988.9 | 1603 | 1603.7 | 9.58  |
| 2494   | 2877.9 | 1602 | 1602.3 | 9.42  |
| 3469.5 | 2763.9 | 1600 | 1600.8 | 9.38  |
| 3699.8 | 2759   | 1599 | 1599.4 | 9.29  |

|        |        |      |        |      |
|--------|--------|------|--------|------|
| 2561.5 | 2587.6 | 1597 | 1597.9 | 9.45 |
| 2523.2 | 2498.1 | 1596 | 1596.5 | 9.35 |
| 2339.2 | 2549.5 | 1595 | 1595   | 9.45 |
| 2286   | 2614.5 | 1593 | 1593.6 | 9.16 |
| 1922.3 | 2661.7 | 1592 | 1592.1 | 9.35 |
| 1780.7 | 2744   | 1590 | 1590.6 | 9.32 |
| 2085.5 | 2909.5 | 1589 | 1589.2 | 9.32 |
| 2882.8 | 3091.7 | 1587 | 1587.7 | 9.42 |
| 3209   | 3259.6 | 1586 | 1586.3 | 9.09 |
| 3988.2 | 3358.3 | 1584 | 1584.8 | 9.12 |
| 4605.7 | 3555.6 | 1583 | 1583.4 | 9.16 |
| 4382   | 3733.6 | 1581 | 1581.9 | 9.15 |
| 4527   | 3827.4 | 1580 | 1580.5 | 9.11 |
| 4186   | 3826.5 | 1579 | 1579   | 9.28 |
| 3372.3 | 3838.3 | 1577 | 1577.6 | 9.21 |
| 4092.5 | 3753   | 1576 | 1576.1 | 9.27 |
| 3738   | 3583.7 | 1574 | 1574.6 | 9.14 |
| 3117.7 | 3465.8 | 1573 | 1573.2 | 9.15 |
| 2872.7 | 3392.9 | 1571 | 1571.7 | 9.27 |
| 3339.4 | 3397   | 1570 | 1570.3 | 9.22 |
| 3050   | 3460   | 1568 | 1568.8 | 9.31 |
| 2743.2 | 3436.5 | 1567 | 1567.4 | 9.36 |
| 3084.8 | 3383.1 | 1565 | 1565.9 | 9.5  |
| 3725.8 | 3442.1 | 1564 | 1564.4 | 9.55 |
| 4230.8 | 3566.8 | 1562 | 1563   | 9.8  |
| 4065.2 | 3650.4 | 1561 | 1561.5 | 8.72 |
| 3834   | 3714.4 | 1560 | 1560.1 | 9.35 |
| 3150.4 | 3783   | 1558 | 1558.6 | 9.33 |
| 3766.8 | 3868.7 | 1557 | 1557.1 | 9.24 |
| 4244   | 3824   | 1555 | 1555.7 | 9.32 |
| 4259.5 | 3664.5 | 1554 | 1554.2 | 9.26 |
| 3754.2 | 3548.6 | 1552 | 1552.8 | 9.21 |
| 3497.7 | 3404.4 | 1551 | 1551.3 | 9.28 |
| 4027   | 3339.2 | 1549 | 1549.8 | 9.04 |
| 3234.3 | 3277.2 | 1548 | 1548.4 | 9.17 |
| 2476.5 | 3217.9 | 1546 | 1546.9 | 9.13 |
| 2790   | 3201.1 | 1545 | 1545.4 | 9.05 |
| 2248.4 | 3060.2 | 1543 | 1544   | 8.88 |
| 2432.5 | 2966.3 | 1542 | 1542.5 | 8.83 |
| 3085.2 | 2907   | 1541 | 1541.1 | 8.9  |
| 3591.8 | 2853.1 | 1539 | 1539.6 | 8.87 |
| 4074.7 | 2762.9 | 1538 | 1538.1 | 9.04 |
| 2204.5 | 2633.3 | 1525 | 1525.9 | 9.12 |
| 2464   | 2494.9 | 1524 | 1524.5 | 9.16 |
| 3375   | 2568.8 | 1522 | 1523   | 9.02 |
| 2641.3 | 2634.8 | 1521 | 1521.5 | 9.04 |
| 1484.8 | 2699.5 | 1520 | 1520.1 | 9.14 |
| 1363.8 | 2637.1 | 1518 | 1518.6 | 9.26 |
| 726.5  | 2832.2 | 1517 | 1517.1 | 9.19 |

|        |        |      |        |      |
|--------|--------|------|--------|------|
| 3245.5 | 2946.4 | 1515 | 1515.7 | 9.11 |
| 3810.8 | 2945   | 1514 | 1514.2 | 9.26 |
| 4304   | 2960.7 | 1512 | 1512.7 | 9.03 |
| 3388   | 3157.5 | 1511 | 1511.2 | 9.14 |
| 4350.5 | 3361.7 | 1509 | 1509.8 | 9.16 |
| 3720   | 3652.7 | 1508 | 1508.3 | 9.52 |
| 3359.5 | 3664.4 | 1506 | 1506.8 | 9.58 |
| 2814.5 | 3566.1 | 1505 | 1505.4 | 9.28 |
| 3649.2 | 3350.9 | 1503 | 1503.9 | 9.31 |
| 3610   | 3370.5 | 1502 | 1502.4 | 9.36 |
| 3927.2 | 3269.5 | 1499 | 1499.5 | 9.62 |
| 3374.8 | 3247.4 | 1498 | 1498   | 9.62 |
| 2729.8 | 3238.1 | 1496 | 1496.6 | 9.61 |
| 1936   | 3374.5 | 1495 | 1495.1 | 9.29 |
| 3603.8 | 3447.4 | 1493 | 1493.6 | 9.2  |
| 3239.7 | 3379.7 | 1492 | 1492.1 | 9.2  |
| 3476.5 | 3285.2 | 1490 | 1490.7 | 9.05 |
| 3257.8 | 3349.3 | 1489 | 1489.2 | 9.1  |
| 4315.2 | 3521.6 | 1487 | 1487.7 | 8.93 |
| 4450.8 | 3796.4 | 1486 | 1486.3 | 9.02 |
| 2865.5 | 3902.9 | 1484 | 1484.8 | 9.03 |
| 2887.5 | 4041.3 | 1481 | 1481.8 | 8.91 |
| 4079.7 | 4086.4 | 1480 | 1480.4 | 8.84 |
| 4625.5 | 4120.1 | 1478 | 1478.9 | 8.85 |
| 4958.2 | 4025.5 | 1477 | 1477.4 | 9.03 |
| 4775   | 4014.4 | 1475 | 1475.9 | 9.07 |
| 4762.2 | 4129.2 | 1474 | 1474.5 | 9.04 |
| 3973.2 | 4209   | 1472 | 1473   | 9.14 |
| 3627.7 | 4230.5 | 1471 | 1471.5 | 9.07 |
| 3274.7 | 4160.3 | 1470 | 1470   | 8.86 |
| 4329.5 | 4102.9 | 1468 | 1468.6 | 9.03 |
| 4127.2 | 4088.6 | 1467 | 1467.1 | 9.15 |
| 3766   | 4032.5 | 1465 | 1465.6 | 9.3  |
| 4316   | 4063.2 | 1464 | 1464.1 | 8.99 |
| 3853.5 | 4001.8 | 1462 | 1462.7 | 9.26 |
| 4326.2 | 4137.6 | 1461 | 1461.2 | 9.38 |
| 4618.5 | 4178.1 | 1459 | 1459.7 | 9.32 |
| 4145   | 4076.3 | 1458 | 1458.2 | 9.26 |
| 4310.8 | 4161.6 | 1456 | 1456.8 | 9.52 |
| 2952.8 | 4093.2 | 1455 | 1455.3 | 9.42 |
| 4767.7 | 4099.5 | 1453 | 1453.8 | 9.35 |
| 4775.8 | 4133.5 | 1452 | 1452.3 | 9.45 |
| 3006.8 | 4116.3 | 1450 | 1450.8 | 9.3  |
| 4704.2 | 4109.7 | 1449 | 1449.4 | 9.5  |
| 3563.5 | 4044.3 | 1447 | 1447.9 | 9.32 |
| 3923.3 | 4148.3 | 1446 | 1446.4 | 9.15 |
| 4700.8 | 4130.3 | 1444 | 1444.9 | 9.4  |
| 4428.5 | 4079   | 1443 | 1443.5 | 9.2  |
| 4073   | 4106   | 1441 | 1442   | 9.58 |

|        |        |      |        |       |
|--------|--------|------|--------|-------|
| 3590.6 | 4063   | 1440 | 1440.5 | 9.89  |
| 4097.3 | 4026.2 | 1439 | 1439   | 9.73  |
| 4569.8 | 4042.8 | 1437 | 1437.5 | 9.96  |
| 4211.8 | 3987   | 1436 | 1436.1 | 9.79  |
| 3303.2 | 3943.2 | 1434 | 1434.6 | 9.75  |
| 4231.7 | 3887.6 | 1433 | 1433.1 | 9.97  |
| 3158   | 3892   | 1431 | 1431.6 | 9.67  |
| 4105.7 | 3667.7 | 1430 | 1430.1 | 9.7   |
| 4087   | 3554   | 1428 | 1428.7 | 9.62  |
| 3947.5 | 3573.7 | 1427 | 1427.2 | 9.77  |
| 3460.5 | 3520.7 | 1425 | 1425.7 | 9.86  |
| 3640   | 3446.5 | 1424 | 1424.2 | 10.04 |
| 1629.8 | 3470.7 | 1422 | 1422.7 | 9.97  |
| 3319   | 3271.8 | 1421 | 1421.3 | 9.93  |
| 4428.7 | 3248.3 | 1419 | 1419.8 | 10.03 |
| 2719.3 | 3220.2 | 1416 | 1416.8 | 9.73  |
| 3415.5 | 3292.6 | 1415 | 1415.3 | 9.72  |
| 3424.2 | 3285.2 | 1413 | 1413.8 | 9.89  |
| 1918.8 | 3470.2 | 1412 | 1412.4 | 9.85  |
| 3828.5 | 3534.5 | 1410 | 1410.1 | 9.87  |
| 3637.7 | 3555.8 | 1407 | 1407.9 | 8.77  |
| 4257   | 3698.9 | 1401 | 1402   | 8.69  |
| 3558.5 | 3760.8 | 1400 | 1400.5 | 8.58  |
| 3664.6 | 3840.4 | 1399 | 1399   | 8.56  |
| 4026.2 | 4064.9 | 1397 | 1397.5 | 8.9   |
| 4663.5 | 4057.6 | 1396 | 1396   | 8.82  |
| 4292.7 | 4141.4 | 1394 | 1394.5 | 8.91  |
| 4097.3 | 4121.4 | 1393 | 1393.1 | 8.92  |
| 4299.5 | 4151.4 | 1391 | 1391.6 | 9.11  |
| 4388.7 | 4191.8 | 1390 | 1390.1 | 9.18  |
| 3748   | 4210   | 1388 | 1388.6 | 9.16  |
| 4559.5 | 4155.6 | 1387 | 1387.1 | 9.14  |
| 4036.5 | 4040.9 | 1385 | 1385.6 | 8.92  |
| 3889   | 3857.3 | 1384 | 1384.1 | 9.1   |
| 4108.2 | 3807.5 | 1381 | 1381.2 | 9.15  |
| 4226.5 | 3725.9 | 1379 | 1379.7 | 9.02  |
| 4065.7 | 3546.9 | 1378 | 1378.2 | 9.12  |
| 3031   | 3323.1 | 1376 | 1376.7 | 9.02  |
| 2077   | 3235.5 | 1375 | 1375.2 | 9.19  |
| 3752   | 3227   | 1373 | 1373.7 | 8.95  |
| 3491.2 | 3210   | 1372 | 1372.2 | 9.46  |
| 1779   | 3159.5 | 1370 | 1370.8 | 9.2   |
| 2098.2 | 3116.1 | 1369 | 1369.3 | 9.04  |
| 3072.3 | 3185.9 | 1367 | 1367.8 | 9.55  |
| 3796   | 3345.8 | 1366 | 1366.3 | 8.91  |
| 3921   | 3308.2 | 1364 | 1364.8 | 9.26  |
| 3671   | 3352.4 | 1363 | 1363.3 | 9.42  |
| 3588.2 | 3574.9 | 1361 | 1361.8 | 9.3   |
| 3799   | 3780   | 1360 | 1360.3 | 9.34  |

|        |        |      |        |      |
|--------|--------|------|--------|------|
| 3836   | 3843.5 | 1358 | 1358.8 | 9.28 |
| 3338   | 3807.4 | 1357 | 1357.4 | 9.26 |
| 3977.5 | 3839.1 | 1355 | 1355.9 | 9.18 |
| 4226.7 | 3901.6 | 1354 | 1354.4 | 9.56 |
| 4354.8 | 3947   | 1352 | 1352.9 | 9.23 |
| 3770   | 3808.9 | 1351 | 1351.4 | 9.4  |
| 3399.5 | 3650.7 | 1349 | 1349.9 | 9.13 |
| 4269.5 | 3769   | 1348 | 1348.4 | 9.19 |
| 4358   | 3834   | 1346 | 1346.9 | 9.17 |
| 4088   | 3789.2 | 1345 | 1345.4 | 9.24 |
| 2280   | 3697.2 | 1343 | 1343.9 | 8.82 |
| 2095.7 | 3796.5 | 1342 | 1342.4 | 9.31 |
| 4639   | 3977.4 | 1340 | 1341   | 9.23 |
| 4692.5 | 3964.9 | 1339 | 1339.5 | 9.2  |
| 3734.3 | 3838.8 | 1337 | 1338   | 9.27 |
| 3343   | 3839.3 | 1336 | 1336.5 | 8.76 |
| 4862.5 | 3919.5 | 1334 | 1335   | 8.59 |
| 5389.2 | 4080   | 1332 | 1322   | 8.12 |
| 4131.8 | 3965.4 | 1320 | 1320.5 | 8.83 |
| 2970.7 | 3750.4 | 1319 | 1319.1 | 9.11 |
| 4093.7 | 3625.6 | 1317 | 1317.6 | 9.15 |
| 3161.5 | 3662.1 | 1316 | 1316.1 | 8.99 |
| 3861.7 | 3461.7 | 1314 | 1314.6 | 9.05 |
| 3378.5 | 3248.8 | 1313 | 1313.1 | 9.48 |
| 2327   | 3093.6 | 1311 | 1311.6 | 9.07 |
| 2362.2 | 3067   | 1310 | 1310.1 | 8.93 |
| 3743.7 | 2889.2 | 1308 | 1308.6 | 8.98 |
| 2658.5 | 2662.7 | 1307 | 1307.1 | 8.96 |
| 3047.5 | 2435.5 | 1305 | 1305.6 | 9.75 |
| 2424.5 | 2388.3 | 1304 | 1304.1 | 8.98 |
| 2678   | 2434.6 | 1302 | 1302.6 | 9.36 |
| 2138   | 2593.8 | 1301 | 1301.1 | 9.42 |
| 670    | 2638.1 | 1299 | 1299.6 | 9.37 |
| 1362.3 | 2690   | 1298 | 1298.1 | 9.2  |
| 2859   | 2770.5 | 1296 | 1296.6 | 8.89 |
| 2837.2 | 2915.8 | 1295 | 1295.1 | 8.81 |
| 4113.5 | 2934   | 1293 | 1293.6 | 8.41 |
| 4230.5 | 3130.1 | 1292 | 1292.1 | 8.44 |
| 3229.3 | 3439.2 | 1290 | 1290.6 | 8.21 |
| 3933.7 | 3722.9 | 1289 | 1289.1 | 8.44 |
| 4022.5 | 3859.5 | 1287 | 1287.6 | 8.75 |
| 2878   | 3972.1 | 1286 | 1286.1 | 8.52 |
| 4295.3 | 3949.4 | 1284 | 1284.6 | 8.46 |
| 4070.5 | 3882.6 | 1283 | 1283.1 | 8.17 |
| 4482.8 | 3918.2 | 1281 | 1281.6 | 8.42 |
| 4361.5 | 3910.4 | 1280 | 1280.1 | 8.23 |
| 4076   | 3860.3 | 1278 | 1278.6 | 8.55 |
| 3863.5 | 3916.5 | 1277 | 1277.1 | 8.65 |
| 3495.7 | 3750.6 | 1275 | 1275.7 | 8.64 |



|        |        |      |        |       |
|--------|--------|------|--------|-------|
| 3621.2 | 3714.8 | 1274 | 1274.2 | 8.71  |
| 3847.9 | 3647.3 | 1272 | 1272.7 | 8.67  |
| 3470.5 | 3592   | 1271 | 1271.2 | 8.47  |
| 3497   | 3566.7 | 1269 | 1269.7 | 8.34  |
| 2469.7 | 3591.8 | 1268 | 1268.2 | 8.99  |
| 3676.5 | 3607.8 | 1266 | 1266.7 | 8.95  |
| 3740.2 | 3634.4 | 1265 | 1265.2 | 8.86  |
| 3754   | 3641.2 | 1263 | 1263.7 | 9.09  |
| 3797   | 3689.8 | 1262 | 1262.2 | 9.12  |
| 4139.8 | 3752.8 | 1260 | 1260.7 | 9.16  |
| 3671.8 | 3900.2 | 1259 | 1259.2 | 9.26  |
| 3914.5 | 3923.4 | 1257 | 1257.7 | 9.51  |
| 3922   | 3972.9 | 1256 | 1256.1 | 9.61  |
| 4005   | 4011.1 | 1254 | 1254.6 | 9.62  |
| 4190.2 | 4075   | 1253 | 1253.1 | 9.77  |
| 4091.3 | 4127.7 | 1251 | 1251.6 | 10.01 |
| 3931.5 | 4229.4 | 1250 | 1250.1 | 10.41 |
| 4285   | 4290.1 | 1248 | 1248.6 | 10.19 |
| 4174.6 | 4373.4 | 1247 | 1247.1 | 10.28 |
| 4499.8 | 4421.3 | 1245 | 1245.6 | 10.29 |
| 4718.7 | 4419.9 | 1244 | 1244.1 | 9.99  |
| 4790.5 | 4423.1 | 1242 | 1242.6 | 10.06 |
| 4583   | 4380.5 | 1241 | 1241.1 | 9.36  |
| 4838.3 | 4278.7 | 1239 | 1239.6 | 9.43  |
| 4531.2 | 4164.6 | 1238 | 1238.1 | 9.38  |
| 4175   | 4099.5 | 1236 | 1236.6 | 9.06  |
| 4126.3 | 4006.7 | 1235 | 1235.1 | 8.81  |
| 3463.2 | 3909.7 | 1233 | 1233.6 | 9.05  |
| 3165.2 | 3766.8 | 1232 | 1232.1 | 8.92  |
| 2919   | 3584.8 | 1230 | 1230.6 | 9.44  |
| 3784.5 | 3482.2 | 1229 | 1229.1 | 9.15  |
| 3697.7 | 3257.4 | 1227 | 1227.6 | 9.11  |
| 3723.3 | 2971.2 | 1226 | 1226.1 | 9.02  |
| 3011.2 | 2856.2 | 1224 | 1224.6 | 9.15  |
| 2836   | 2847.5 | 1223 | 1223.1 | 8.81  |
| 3403   | 2843.8 | 1221 | 1221.6 | 9.12  |
| 1701.5 | 2910.4 | 1220 | 1220.1 | 9.09  |
| 978.5  | 3022   | 1218 | 1218.6 | 8.94  |
| 2198.5 | 3128.9 | 1217 | 1217.1 | 9.36  |
| 3069   | 3289.4 | 1215 | 1215.6 | 9.4   |
| 2878.5 | 3449.8 | 1214 | 1214.1 | 9.22  |
| 4517.2 | 3376.6 | 1212 | 1212.6 | 9.45  |
| 4925.7 | 3536.1 | 1211 | 1211.1 | 9.28  |
| 4899   | 3697.5 | 1209 | 1209.5 | 9.29  |
| 4776.7 | 3770.6 | 1208 | 1208   | 9.38  |
| 4600   | 3539.9 | 1206 | 1206.5 | 9.5   |
| 2598.3 | 3380.2 | 1189 | 1190   | 9.03  |
| 3455.2 | 3256.4 | 1188 | 1188.5 | 9.18  |
| 2754.2 | 3148.2 | 1186 | 1186.9 | 9.14  |

|        |        |      |        |      |
|--------|--------|------|--------|------|
| 3002   | 3060.9 | 1185 | 1185.4 | 9.27 |
| 531.75 | 2933.4 | 1183 | 1183.9 | 9.26 |
| 1122.3 | 2769.9 | 1182 | 1182.4 | 9.03 |
| 3154.8 | 2865.6 | 1180 | 1180.9 | 9.36 |
| 3735.5 | 2930.9 | 1179 | 1179.4 | 9.41 |
| 3939.5 | 3060.8 | 1177 | 1177.9 | 9.46 |
| 3373.5 | 3189.9 | 1176 | 1176.4 | 9.12 |
| 2802   | 3506.9 | 1174 | 1174.9 | 9.32 |
| 3650.7 | 3774.4 | 1173 | 1173.4 | 9.66 |
| 4173.3 | 3894.2 | 1171 | 1171.9 | 9.4  |
| 4183.7 | 3935.3 | 1170 | 1170.4 | 9.48 |
| 4421.8 | 3891.5 | 1168 | 1168.8 | 9.58 |
| 4018.7 | 3829.3 | 1167 | 1167.3 | 9.55 |
| 4064.7 | 3936.5 | 1165 | 1165.8 | 9.3  |
| 4472.5 | 3961.7 | 1164 | 1164.3 | 9.33 |
| 4188.2 | 3832.1 | 1162 | 1162.8 | 9.27 |
| 3457.5 | 3872.2 | 1161 | 1161.3 | 9.22 |
| 2688.5 | 3851.1 | 1159 | 1159.8 | 9.17 |
| 3981.5 | 3908.9 | 1158 | 1158.3 | 9.55 |
| 3928.5 | 3951.9 | 1156 | 1156.8 | 9.34 |
| 2747.7 | 3960.4 | 1155 | 1155.3 | 9.14 |
| 4624   | 3975.2 | 1153 | 1153.7 | 9.32 |
| 4190.2 | 3952.7 | 1152 | 1152.2 | 9.21 |
| 4654.7 | 3967.6 | 1150 | 1150.7 | 9.18 |
| 4537.5 | 3932.6 | 1149 | 1149.2 | 9.32 |
| 4565.5 | 3904.1 | 1147 | 1147.7 | 9.24 |
| 4352   | 4049.1 | 1146 | 1146.2 | 9.37 |
| 3209.5 | 3897.1 | 1144 | 1144.7 | 9.44 |
| 2852.2 | 3817.8 | 1143 | 1143.2 | 9.47 |
| 3596.5 | 3598.1 | 1141 | 1141.7 | 9.29 |
| 3615.2 | 3543.3 | 1140 | 1140.1 | 9.33 |
| 4342.2 | 3493.9 | 1138 | 1138.6 | 9.35 |
| 2952.5 | 3500.8 | 1137 | 1137.1 | 9.15 |
| 3318   | 3610.3 | 1135 | 1135.6 | 9.03 |
| 2237.5 | 3726.3 | 1134 | 1134.1 | 9.05 |
| 3934.8 | 3755.8 | 1132 | 1132.6 | 9.35 |
| 4022.3 | 3723.3 | 1131 | 1131.1 | 9.23 |
| 4428   | 3682.7 | 1129 | 1129.6 | 9.28 |
| 4413.8 | 3695   | 1128 | 1128.1 | 9.32 |
| 4129   | 3565.1 | 1126 | 1126.5 | 9.2  |
| 3920.3 | 3485.5 | 1125 | 1125   | 9.41 |
| 3258   | 3523.8 | 1123 | 1123.5 | 9.23 |
| 3895.7 | 3489.5 | 1122 | 1122   | 9.31 |
| 3087.2 | 3219.2 | 1120 | 1120.5 | 9.81 |
| 1889.8 | 3061.8 | 1118 | 1119   | 9.65 |
| 1361.3 | 2958   | 1117 | 1117.5 | 9.34 |
| 4357   | 2917.5 | 1115 | 1115.9 | 9.42 |
| 3645   | 2921.1 | 1114 | 1114.4 | 9.5  |
| 1454   | 2795.8 | 1112 | 1112.9 | 9.34 |

|        |        |      |        |      |
|--------|--------|------|--------|------|
| 2682.7 | 2792.2 | 1111 | 1111.4 | 9.22 |
| 2986.5 | 2730.8 | 1109 | 1109.9 | 9.43 |
| 3475   | 2634.3 | 1108 | 1108.4 | 9.6  |
| 3298   | 2326.8 | 1106 | 1106.9 | 9.65 |
| 2517.8 | 2041.8 | 1105 | 1105.3 | 9.55 |
| 3047   | 2098.3 | 1103 | 1103.1 | 9.49 |
| 1214.5 | 1899.7 | 1100 | 1100.8 | 9.21 |
| 300.25 | 1928.9 | 1099 | 1099.3 | 9.53 |
| 974.5  | 2004.1 | 1097 | 1097.8 | 9.45 |
| 509.25 | 2097.3 | 1096 | 1096.3 | 9.77 |
| 2076.2 | 2274.7 | 1094 | 1094.7 | 9.58 |
| 498.13 | 2256.9 | 1093 | 1093.2 | 9.95 |
| 3307.3 | 2325.4 | 1091 | 1091.7 | 9.3  |
| 4302.5 | 2599.7 | 1090 | 1090.2 | 9.13 |
| 4322.5 | 2738.5 | 1088 | 1088.7 | 9.11 |
| 4469.5 | 3014.1 | 1087 | 1087.2 | 9.46 |
| 2851.7 | 3141.6 | 1085 | 1085.6 | 8.84 |
| 1967.3 | 3448.9 | 1082 | 1082.6 | 8.64 |
| 3318.2 | 3520.5 | 1081 | 1081.1 | 9.33 |
| 2501.2 | 3467.5 | 1076 | 1076.6 | 8.49 |
| 3540.2 | 3405.4 | 1068 | 1069   | 9    |
| 3478.5 | 3299.8 | 1067 | 1067.4 | 9.07 |
| 3878.8 | 3366.6 | 1065 | 1065.9 | 9.3  |
| 4095   | 3485.3 | 1064 | 1064.4 | 9.22 |
| 3719   | 3434.5 | 1062 | 1062.9 | 9.34 |
| 3640.2 | 3559.6 | 1061 | 1061.4 | 9.2  |
| 3307.7 | 3582   | 1059 | 1059.9 | 9.2  |
| 3586.7 | 3604.8 | 1058 | 1058.3 | 9.2  |
| 3273   | 3616.5 | 1056 | 1056.8 | 9.2  |
| 2758.7 | 3614.2 | 1055 | 1055.3 | 8.95 |
| 3877.5 | 3686.7 | 1053 | 1053   | 8.78 |
| 3786.7 | 3743.3 | 1050 | 1050.7 | 8.9  |
| 3729.3 | 3858.1 | 1049 | 1049.2 | 8.93 |
| 4008   | 3938.6 | 1047 | 1047.7 | 8.96 |
| 4068.8 | 4047.1 | 1046 | 1046.2 | 8.9  |
| 4517.2 | 4181.5 | 1044 | 1044.7 | 8.64 |
| 4263   | 4233.6 | 1043 | 1043.2 | 8.98 |
| 4570.5 | 4269   | 1041 | 1041.6 | 9.58 |
| 4471.5 | 4334.7 | 1040 | 1040.1 | 9.07 |
| 4466.8 | 4393.1 | 1038 | 1038.6 | 9.17 |
| 4237.5 | 4437.8 | 1037 | 1037.1 | 9.22 |
| 4450.2 | 4453.6 | 1035 | 1035.6 | 8.94 |
| 4176.3 | 4482.2 | 1034 | 1034   | 9.31 |
| 4452   | 4489.5 | 1032 | 1032.5 | 9.16 |
| 4650.2 | 4491.6 | 1030 | 1031   | 9.18 |
| 4560.8 | 4497.4 | 1029 | 1029.5 | 9.37 |
| 4690.5 | 4447.9 | 1027 | 1028   | 9.39 |
| 4578.2 | 4493.6 | 1026 | 1026.4 | 9.16 |
| 4650.8 | 4503.6 | 1024 | 1024.9 | 9.23 |

|        |        |      |        |       |
|--------|--------|------|--------|-------|
| 4494.2 | 4545.6 | 1023 | 1023.4 | 9.15  |
| 4530.7 | 4581.9 | 1021 | 1021.9 | 9.12  |
| 3692.9 | 4602.6 | 1020 | 1020.4 | 9.23  |
| 4952.7 | 4631.7 | 1018 | 1018.8 | 9.25  |
| 4286.7 | 4651.5 | 1017 | 1017.3 | 9.41  |
| 4914.2 | 4657.4 | 1015 | 1015.8 | 9.54  |
| 5049   | 4686.3 | 1014 | 1014.3 | 9.3   |
| 4788.8 | 4712.9 | 1012 | 1012.7 | 9.32  |
| 5010   | 4738   | 1011 | 1011.2 | 9.38  |
| 4796.2 | 4608.8 | 1009 | 1009.7 | 9.61  |
| 4715.5 | 4539.8 | 1008 | 1008.2 | 9.52  |
| 4812.3 | 4462.7 | 1006 | 1006.7 | 9.74  |
| 4823.2 | 4313.5 | 1005 | 1005.1 | 9.86  |
| 3969.3 | 4221.1 | 1003 | 1003.6 | 10.06 |
| 3531.8 | 4054   | 1002 | 1002.1 | 9.57  |
| 3527.5 | 3897.4 | 1000 | 1000.6 | 9.6   |
| 4066.8 | 3672.7 | 999  | 999.05 | 9.53  |
| 3407.7 | 3488.1 | 997  | 997.53 | 9.42  |
| 3772.3 | 3279.8 | 996  | 996    | 9.34  |
| 3171.2 | 3245.7 | 994  | 994.48 | 9.58  |
| 3073.5 | 3225.4 | 992  | 992.96 | 9.67  |
| 2244   | 3234.1 | 991  | 991.43 | 9.87  |
| 2781.5 | 3233.5 | 989  | 989.91 | 9.72  |
| 2532   | 3250.4 | 988  | 988.39 | 9.99  |
| 3594.3 | 3209.8 | 986  | 986.86 | 9.79  |
| 3308.7 | 3233.1 | 985  | 985.34 | 9.67  |
| 3623   | 3246.7 | 983  | 983.82 | 9.42  |
| 4060.5 | 3400.2 | 982  | 982.29 | 9.68  |
| 3593.2 | 3508.6 | 980  | 980.77 | 9.72  |
| 3325.3 | 3629.2 | 979  | 979.25 | 9.72  |
| 3428   | 3651.6 | 977  | 977.72 | 9.59  |
| 3222.7 | 3725.9 | 976  | 976.2  | 9.46  |
| 3932.5 | 3655   | 974  | 974.68 | 9.5   |
| 3974   | 3675.9 | 973  | 973.15 | 9.6   |
| 3858.5 | 3691.9 | 971  | 971.63 | 9.37  |
| 3841.4 | 3793.5 | 970  | 970.1  | 9.33  |
| 4125.5 | 3785.3 | 968  | 968.58 | 9.3   |
| 2843   | 3867.9 | 967  | 967.05 | 9.19  |
| 4291   | 3791.4 | 965  | 965.53 | 9.44  |
| 3768.7 | 3804.7 | 964  | 964    | 9.15  |
| 4443.2 | 3803.7 | 962  | 962.48 | 9.42  |
| 3337.2 | 3776.2 | 960  | 960.95 | 9.44  |
| 4131.8 |        | 959  | 959.43 | 9.2   |
| 3091.2 |        | 957  | 957.9  | 9.3   |
| 4120.5 |        | 956  | 956.38 | 9.2   |
| 3846.5 |        | 954  | 954.85 | 8.96  |
| 3539.5 |        | 953  | 953.33 | 9.48  |
